# Supplementary material for: RB1‑promoter methylation in glioblastoma: A rare event in glioblastoma
Source: PubMed Central journal article supplement — Oncol Rep. 2023 Jun 2;50(1):143. doi: 10.3892/or.2023.8580 (PMC10285611; doi:10.3892/or.2023.8580), 2023-06-02

Figure S1. Methylation-specific PCR of the MGMT gene in glioblastomas. Tumor samples (Sample 1 and 2) as well as a control with unmethylated and methylated DNA, and a quality control without DNA, were analyzed for the detection of bands for a M- or U-MGMT gene. MGMT, O-6-methylguanine-DNA methyl transferase; M, methylated; U, unmethylated.

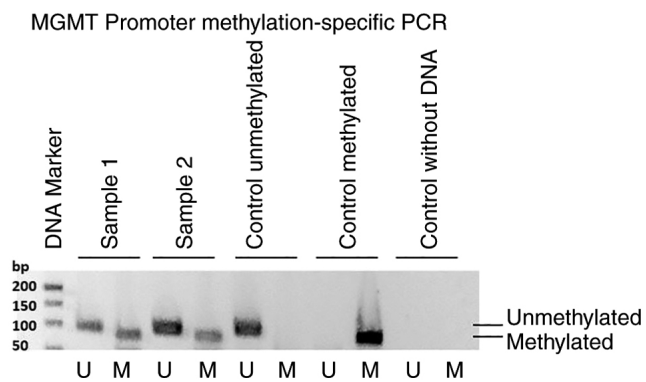

Supplement: Supplementary_Data.pdf [file Supplementary_Data.pdf]
